# Supplementary material for: Clinically meaningful and lasting HbA1c improvement rarely occurs after 5 years of type 1 diabetes: an argument for early, targeted and aggressive intervention following diagnosis
Source: PubMed Central journal article supplement (PMC6448997; doi:10.1007/s00125-018-4574-6), 2018-02-24
Supplement: 125_2018_4574_MOESM1_ESM.pdf [file 125_2018_4574_MOESM1_ESM.pdf]

**ESM Table 1**

| <b>Study</b>    | <b>Year</b> | <b>Number of patients</b> | <b>Age at study entry *</b> | <b>Duration of follow-up (years)</b> | <b>Other findings</b>                                                                                      | <b>Limitations</b>                                                                           |
|-----------------|-------------|---------------------------|-----------------------------|--------------------------------------|------------------------------------------------------------------------------------------------------------|----------------------------------------------------------------------------------------------|
| Forsander [1]   | 1998        | 38                        | 3-15 years                  | 5                                    | Patients with poor HbA1c at five years of diabetes can be identified by the second year                    | Prevalent cases, small cohort size, paediatric population, short duration of follow up       |
| Jorde [2]       | 2000        | 214                       | 30.4 ± 11.9                 | 6                                    | The coefficient of variation for HbA1c was negatively related to age, and accordingly, to years on insulin | Small cohort size, short duration of follow up, different statistical approach               |
| Luyckx [3]      | 2009        | 72                        | 13                          | 10                                   | Family climate and self-concept associate with higher HbA1c                                                | Prevalent cases, small cohort size, paediatric population                                    |
| Edge [4]        | 2010        | 362                       | 0–18 years                  | 15                                   | HbA1c levels at 6 months after diagnosis increased with age with a quadratic fit                           | Prevalent cases, small cohort size, different statistical approach, no information on gender |
| Helgeson [5]    | 2010        | 132                       | 12                          | 5                                    | Low social status, BMI, pubertal status associate with higher subsequent HbA1c                             | Prevalent cases, small cohort size, paediatric population                                    |
| Viswanathan [6] | 2011        | 120                       | 7.6 ± 3.9                   | 4                                    | No other baseline variables correlated with subsequent glycaemic control.                                  | Prevalent cases, short duration of follow up, small cohort size, paediatric population       |
| Jackson [7]     | 2012        | 155                       | 6.6                         | 14                                   | HbA1c levels at diagnosis and within the first year were significant predictors of long-term control       | Prevalent cases, small cohort size, paediatric population                                    |
| Shalitin [8]    | 2012        | 173                       | 3.8 ± 1.6                   | 7                                    | The findings was not dependent on the type of insulin regimens                                             | Prevalent cases, paediatric population, small cohort size                                    |
| Cabrera [9]     | 2013        | 138                       | 6.8 ± 3.3                   | 5                                    | Education and location at time of diagnosis do not appear to play a                                        | Prevalent cases, short duration of follow up,                                                |

|                 |      |       |                      |    |                                                                                                                                                                            |                                                                                                          |
|-----------------|------|-------|----------------------|----|----------------------------------------------------------------------------------------------------------------------------------------------------------------------------|----------------------------------------------------------------------------------------------------------|
|                 |      |       |                      |    | significant role in long-term glycaemic control.                                                                                                                           | paediatric population, no direct exploration of tracking, small cohort size, different primary objective |
| Gill [10]       | 2013 | 181   | 41 ± 8               | 5  | Small improvements can occur in specific sub-groups – notably males and those with poor baseline control.                                                                  | Prevalent cases, small cohort size, short duration of follow up                                          |
| Samuelsson [11] | 2013 | 1,543 | 5-19 years           | 12 | Girls have higher mean HbA1c than boys.                                                                                                                                    | Prevalent cases, different statistical approach, paediatric population                                   |
| Clements [12]   | 2014 | 2218  | 0-20                 | 5  | Teenage years and black ethnicity associate with higher HbA1c                                                                                                              | Short duration of follow up, paediatric population                                                       |
| Hofer [13]      | 2014 | 1,146 | 7.2 (IQR 4.7-9.4)    | 20 | A significant increase in HbA1c is seen during puberty                                                                                                                     | Different statistical approach                                                                           |
| Lawes [14]      | 2014 | 155   | 7.9 (4.5 - 10.9)     | 5  | The relationship between HbA1c at 6 months after diagnosis and future metabolic control was independent of potential patient and observation level confounders.            | Prevalent cases, small cohort size, short duration of follow up, paediatric population,                  |
| Clements [15]   | 2016 | 8,774 | 8-18 and 16-26 years |    | Elevated HbA1c in 16 – 18 yr-olds begin a steady improvement into early adulthood. Gender failed to show a clinically significant association with mean age-centered HbA1c | Prevalent cases                                                                                          |
| Schwandt [16]   | 2017 | 6,433 | 8 years              | 11 | Distinct HbA1c trajectories over the period of follow up can be predicted by BMI, frequency of glucose testing and physical activity levels                                | Prevalent cases, narrow age range included                                                               |

**ESM Table 1.** Previous studies exploring the phenomenon of glycaemic tracking listed in chronological order. Presented as mean ± standard deviation, median (interquartile range) or minimum-maximum, HbA1c: Glycated Haemoglobin,

## References

- [1] Forsander G, Persson B, Sundelin J, Berglund E, Snellman K, Hellstrom R (1998) Metabolic control in children with insulin-dependent diabetes mellitus 5 y after diagnosis. Early detection of patients at risk for poor metabolic control. *Acta Paediatr* 87: 857-864
- [2] Jorde R, Sundsfjord J (2000) Intra-individual variability and longitudinal changes in glycaemic control in patients with Type 1 diabetes mellitus. *Diabet Med* 17: 451-456
- [3] Luyckx K, Seiffge-Krenke I (2009) Continuity and change in glycemic control trajectories from adolescence to emerging adulthood: relationships with family climate and self-concept in type 1 diabetes. *Diabetes Care* 32: 797-801
- [4] Edge JA, James T, Shine B (2010) Persistent individual tracking within overall improvement in HbA1c in a UK paediatric diabetes clinic over 15 years. *Diabet Med* 27: 1284-1288
- [5] Helgeson VS, Snyder PR, Seltman H, Escobar O, Becker D, Siminerio L (2010) Brief report: trajectories of glycemic control over early to middle adolescence. *J Pediatr Psychol* 35: 1161-1167
- [6] Viswanathan V, Sneeringer MR, Miller A, Eugster EA, DiMeglio LA (2011) The utility of hemoglobin A1c at diagnosis for prediction of future glycemic control in children with type 1 diabetes. *Diabetes Res Clin Pract* 92: 65-68
- [7] Jackson C, Wernham, EM, Elder, CJ, Wright, NP (2013) Early glycaemic control is predictive of long-term control: a retrospective observational study. *Practical Diabetes* 30: 16-18
- [8] Shalitin S, Phillip M (2012) Which factors predict glycemic control in children diagnosed with type 1 diabetes before 6.5 years of age? *Acta Diabetol* 49: 355-362
- [9] Cabrera SM, Srivastava NT, Behzadi JM, Pottorff TM, Dimeglio LA, Walvoord EC (2013) Long-term glycemic control as a result of initial education for children with new onset type 1 diabetes: does the setting matter? *Diabetes Educ* 39: 187-194
- [10] GV Gill WM, Wallymahmed A, MacFarlane IA, Woodward A (2013) Glycaemic streaming in type 1 diabetes: implications for intervention? . *Practical Diabetes* 30: 229–232
- [11] Samuelsson U, Steineck I, Gubbjornsdottir S (2014) A high mean-HbA1c value 3-15 months after diagnosis of type 1 diabetes in childhood is related to metabolic control, macroalbuminuria, and retinopathy in early adulthood--a pilot study using two nation-wide population based quality registries. *Pediatr Diabetes* 15: 229-235
- [12] Clements MA, Lind M, Raman S, et al. (2014) Age at diagnosis predicts deterioration in glycaemic control among children and adolescents with type 1 diabetes. *BMJ Open Diabetes Res Care* 2: e000039
- [13] Hofer SE, Raile K, Frohlich-Reiterer E, et al. (2014) Tracking of metabolic control from childhood to young adulthood in type 1 diabetes. *J Pediatr* 165: 956-961 e951-952
- [14] Lawes T, Franklin V, Farmer G (2014) HbA1c tracking and bio-psychosocial determinants of glycaemic control in children and adolescents with type 1 diabetes: retrospective cohort study and multilevel analysis. *Pediatr Diabetes* 15: 372-383
- [15] Clements MA, Foster NC, Maahs DM, et al. (2016) Hemoglobin A1c (HbA1c) changes over time among adolescent and young adult participants in the T1D exchange clinic registry. *Pediatr Diabetes* 17: 327-336
- [16] Schwandt A, Hermann JM, Rosenbauer J, et al. (2017) Longitudinal Trajectories of Metabolic Control From Childhood to Young Adulthood in Type 1 Diabetes From a Large German/Austrian Registry: A Group-Based Modeling Approach. *Diabetes Care* 40: 309-316

ESM Figure 1

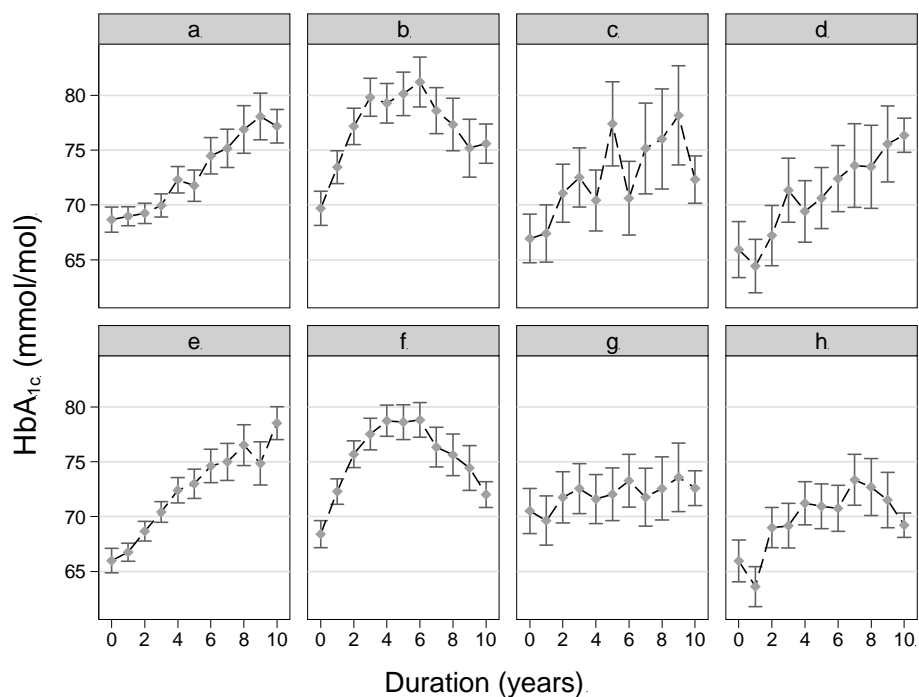

ESM Fig 1: HbA<sub>1c</sub> change with time from diagnosis in individuals with type 1 diabetes displayed according to their sex and age range at which they were diagnosed. Males are panels (a-d). Females are panels (e-h). Age group 0-10 years are panels (a,e), age group 10-20 are panels (b,f), age group 20-30 are panels (c,g), age groups 30-40 are panels (d,h). Duration time 0 represents the HbA<sub>1c</sub> values captured from date of diagnosis to year 1; time 1 represents the HbA<sub>1c</sub> measurements from year 1 to 2, etc.

ESM Figure 2

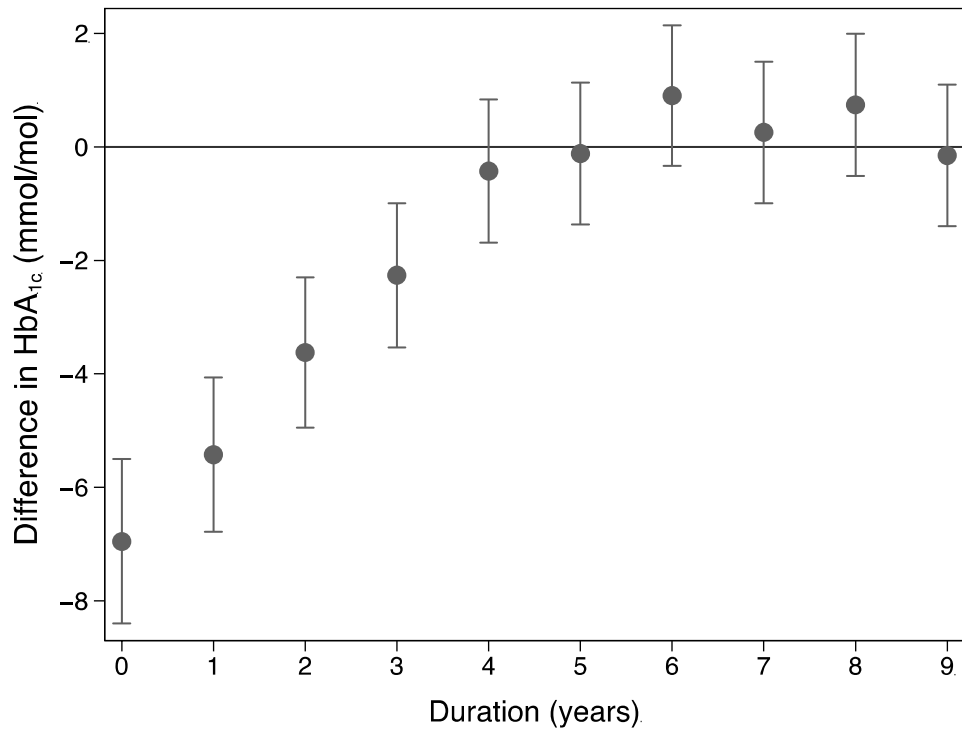

ESM Fig 2: HbA<sub>1c</sub> change with time from diagnosis in individuals with type 1 diabetes. Random intercept and slopes model-Adjusted for sex, age and Townsend index. (restricted to individuals with 10 years or more of follow-up). Duration time 0 represents the HbA<sub>1c</sub> values captured from date of diagnosis to year 1; time 1 represents the HbA<sub>1c</sub> measurements from year 1 to 2, etc.
